# Supplementary material
Source: publisher figshare collection journal article supplement (https://wiley.figshare.com/articles/dataset/_/3559965)
Supplement: Supplementary file 2 [file 1 › appendix-C.htm]

Ecological Archives E095-190-A3


*Ecological Archives* E095-190-A3

Tobias Roth, Nicolas Strebel, Valentin Amrhein. 2014. Estimating unbiased phenological trends by adapting site-occupancy models. *Ecology* 95:2144–2154. http://dx.doi.org/10.1890/13-1830.1

Appendix C. Field methods and analyses of the butterfly surveys of the Aargau Biodiversity Monitoring Program.

> View / download PDF.


---

[Back to E095-190]
